# 1    **High-resolution cryo-EM structure of photosystem II: Effects of electron beam** 2    **damage**

3    Koji Kato<sup>1,4</sup>, Naoyuki Miyazaki<sup>2,4</sup>, Tasuku Hamaguchi<sup>3,4</sup>, Yoshiki Nakajima<sup>1</sup>, Fusamichi  
4    Akita<sup>1,\*</sup>, Koji Yonekura<sup>3,\*</sup> and Jian-Ren Shen<sup>1,\*</sup>

5

6    <sup>1</sup> *Research Institute for Interdisciplinary Science and Graduate School of Natural*  
7    *Science and Technology, Okayama University, 3-1-1 Tsushima Naka, Okayama*  
8    *700-8530, Japan*

9    <sup>2</sup> *Life Science Center for Survival Dynamics, Tsukuba Advanced Research Alliance*  
10    *(TARA), University of Tsukuba, Ibaraki 305-8577, Japan*

11    <sup>3</sup> *Biostructural Mechanism Laboratory, RIKEN Spring-8 Center, 1-1-1 Kouto, Sayo-cho,*  
12    *Sayo-gun, Hyogo 679-5148, Japan*

13

14    <sup>4</sup>These authors contributed equally to this work.

15

16    \*Corresponding Authors:

17    Fusamichi Akita, E-mail: fusamichi\_a@okayama-u.ac.jp

18    Koji Yonekura, E-mail: yone@spring8.or.jp

19    Jian-Ren Shen, E-mail: shen@cc.okayama-u.ac.jp

20

21

22

23

## 24 **Abstract**

25 Photosystem II (PSII) plays a key role in water-splitting and oxygen evolution. X-ray  
 26 crystallography has revealed its atomic structure and some intermediate structures.  
 27 However, these structures are in the crystalline state, and its final state structure has not  
 28 been solved because of the low efficiencies of the S-state transitions in the crystals. Here  
 29 we analyzed the structure of PSII in solution at 1.95 Å resolution by single-particle  
 30 cryo-electron microscopy (cryo-EM). The structure obtained is similar to the crystal  
 31 structure, but a PsbY subunit was visible in the cryo-EM structure, indicating that it  
 32 represents its physiological state more closely. Electron beam damage was observed at a  
 33 high-dose in the regions that were easily affected by redox states, which was reduced by  
 34 reducing the electron dose. This study will serve as a good indicator for determining  
 35 damage-free cryo-EM structures of not only PSII but also all biological samples,  
 36 especially redox-active metalloproteins.

37

38

## 39     **Introduction**

40         PSII is a multi-subunit pigment-protein complex embedded in the thylakoid  
 41     membranes of higher plants, green algae and cyanobacteria, and is the only molecular  
 42     machine capable of oxidizing water by use of visible light in the nature. Water molecules  
 43     are split into electrons, hydrogen atoms and oxygen molecules at the catalytic center of  
 44     PSII, namely, the oxygen-evolving complex (OEC), through four electron and/or proton  
 45     removing steps as described in the Si-state cycle (with  $i = 0-4$ , where  $i$  indicates the  
 46     number of oxidative equivalents accumulated)<sup>1</sup>.

47         In order to elucidate the mechanism of the water-splitting reaction, the structure of  
 48     PSII has been studied extensively by X-ray diffraction (XRD) with synchrotron radiation  
 49     (SR)<sup>2-6</sup>. The SR structure of PSII at an atomic resolution revealed that OEC is a  $\text{Mn}_4\text{CaO}_5$   
 50     cluster organized into a distorted-chair form, in which the cuboidal part is composed of  
 51      $\text{Mn}_3\text{CaO}_4$  and the outer manganese is attached to the cuboid via two  $\mu$ -oxo-bridges<sup>6</sup>.  
 52     However, based on the extended X-ray absorption fluorescence spectra (EXAFS)  
 53     analysis, the dose used for collecting the SR structure at 1.9 Å resolution may cause 25%  
 54     of the Mn ions in OEC to be reduced to  $2^+$  ions, causing some elongations in the Mn-Mn  
 55     distances in the structure<sup>7</sup>. This issue is overcome by the use of X-ray free electron lasers  
 56     (XFEL), which provide X-ray pulses with ultra-short durations that enable collection of  
 57     the diffraction data before onset of the radiation damage (diffraction before destruction)<sup>8</sup>.  
 58     Using XFELs, radiation damage free structure of PSII was solved at a high resolution by  
 59     an approach called fixed-target serial rotational crystallography, which uses multiple  
 60     large PSII crystals by a shot-and-move/rotation method<sup>9,10</sup>. The result showed a

61 shortening of 0.1-0.2 Å in some of the Mn-Mn distances, indicating that the structure  
 62 represents a damage free one<sup>10</sup>. By a combination of serial femtosecond X-ray  
 63 crystallography (SFX) with XFELs and small crystals, structures of S-state intermediates  
 64 up to S<sub>3</sub>-state were analyzed by pump-probe experiments where snapshot diffraction  
 65 images were collected from flash-illuminated PSII crystals<sup>11-14</sup>. These results  
 66 demonstrated the appearance of a new oxygen atom O<sub>6</sub> (O<sub>x</sub>) close to O<sub>5</sub> between Mn1  
 67 and Mn4 upon two flashes, suggesting insertion of a water molecule in the S<sub>2</sub> → S<sub>3</sub>  
 68 transition for O=O bond formation. However, all these studies were conducted with PSII  
 69 crystals, and the efficiencies of the S-state transitions in the microcrystals were reported  
 70 to be slightly lower compared with those in solution using light-induced Fourier  
 71 transform infrared difference spectroscopy<sup>15</sup>. Moreover, it is unknown if the structure of  
 72 PSII in the crystalline state is the same as those in the solution.

73 Cryo-electron microscopy (cryo-EM) can solve the structures of proteins in solution  
 74 without crystallization, which may represent the physiological states of proteins more  
 75 closely. It can also analyze the dynamic changes of proteins in solutions in the time range  
 76 of ms, provided that cooling of the samples is rapid enough. In recent years, the technique  
 77 of cryo-EM has been developed rapidly, and the resolutions of structures that can be  
 78 solved by cryo-EM are increased dramatically<sup>16-18</sup>. However, there is also the issue of  
 79 damage caused by the electron beam during cryo-EM data collection, even though the  
 80 cryo-EM is usually conducted at a low temperature. Radiation damage has been  
 81 extensively studied with X-rays, and it has been shown that the damage mainly manifests  
 82 as breakage of disulfide bonds, decarboxylation of acidic amino and photoreduction of

83 metal centers<sup>7,19-21</sup>. The damage caused by electron beams have also been shown in  
 84 cryo-EM analysis<sup>17</sup>. In order to obtain a high resolution, however, cryo-EM studies are  
 85 usually conducted at a high-dose of electron beams without paying much attention to the  
 86 electron beam damage. In this paper, we analyzed the structure of PSII in ice by cryo-EM  
 87 at a resolution of 1.95 Å, and investigated the electron beam damage to PSII, especially  
 88 its OEC, upon dose accumulation. We show that the structure of PSII analyzed by cryo-EM  
 89 may represent the physiological state more closely, as it retains the PsbY subunit.  
 90 However, it suffers from a severe electron beam damage at a high-dose, and this damage  
 91 was reduced at a much decreased dose without a significant loss of resolution. These  
 92 results are not only important for the analysis of the PSII structure in solution, but also  
 93 provide important implications for all cryo-EM studies that use considerably high-doses  
 94 for imaging.

95

## 96 **Result**

### 97 **High resolution single particle analysis of the PSII**

98 To obtain the high resolution structure of PSII, three data sets of single-particle  
 99 images of the PSII dimer from *T. vulcanus* were collected using Thermo Fisher Scientific  
 100 Titan Krios and JEOL CRYO ARM 300 at different conditions as summarized in Table 1.  
 101 Because the sample for the 75 x k magnification using Titan contained 5% glycerol in the  
 102 buffer, the sample was diluted ten times with the buffer without glycerol. The other  
 103 samples did not contain the glycerol and were concentrated by PEG 1450 precipitation in  
 104 the final step. Image processing yielded final resolutions of 2.22 Å for the data set

collected at 75 x k magnification using Titan Krios (Titan-75k), 2.20 Å for the data set collected at 96 x k magnification using Titan Krios (Titan-96k), and 1.95 Å for the data set collected at 60 x k magnification using CRYO ARM 300 (ARM-60k) (Table 1, Table 2 and Supplementary Fig. 1-4). These results indicate that the quality of the cryo-EM density maps achieved were at the level comparable to those obtained with SR and XFEL previously<sup>6,10</sup>. The resolutions of the Titan-75k and Titan-96k data were almost the same, in spite of the different magnifications and buffers used. The resolution of the ARM-60k data was significantly better than that of the Titan-96k data, despite that the same buffer condition was used for the two data sets. The resolution achieved by cryo-EM depends on a number of factors, including sample quality, the type and preparations of cryo-grids used, the thickness of ice in the samples, microscope alignment and imaging conditions, etc. However, the major one could be the electron beam source. The CRYO ARM 300 microscope has a cold field emission gun (CFEG) that produces an electron beam with a high temporal-coherence and superior high-resolution signals<sup>22</sup> over that from the Schottky emission gun equipped in the Krios microscope.

In Fig. 1, the squared inverse resolution of reconstructions achieved from random subsets of particles is plotted against the subset size on a logarithmic scale. This is known as Rosenthal-Henderson plot<sup>23</sup>. These plots indicated that the resolution is proportional to the log of particle size. The B-factors estimated from these plots are 60.8 for the Titan-75k data set, 74.9 for the Titan-96k data set and 43.3 Å<sup>2</sup> for the ARM-60k data set. The ARM-60k data set again shows the lowest value, in agreement with its highest resolution.

127

## 128 **Overall structure of PSII**

129       The overall atomic model of PSII was built based on the highest 1.95-Å resolution  
130 density map reconstructed from the ARM-60k data set. At this resolution, the features of  
131 cofactors and water molecules can be easily identified in the map (Fig. 2). The overall  
132 architecture of the PSII dimer from *T. vulcanus* is very similar to that of SR (PDB:  
133 3WU2)<sup>6</sup> and XFEL structures (PDB: 4UB6 and 4UB8)<sup>10</sup>, except for PsbY. The density of  
134 PsbY is present in one of the two monomers in the native (PDB: 4UB6)<sup>10</sup> and the  
135 Sr<sup>2+</sup>-substituted PSII dimer structures (PDB: 4IL6)<sup>24</sup> but absent in the SR structure (PDB:  
136 3WU2)<sup>6</sup>. However, this density was seen in both sides of the PSII dimer in the cryo-EM  
137 structure, although the density is somewhat poorer compared with that of the other  
138 assigned subunits (Fig. 2a, f). This suggests that the cryo-EM structure more closely  
139 represents the native state of PSII.

140       The root mean square deviation (RMSD) is 0.40 Å for 5227 C<sub>α</sub> atoms between the  
141 structures of cryo-EM and SR, and 0.46 Å for 5267 C<sub>α</sub> atoms between the structures of  
142 cryo-EM and XFEL. Because the RMSD was 0.32 Å for 5241 C<sub>α</sub> atoms between the SR  
143 and XFEL structures of PSII dimers, the cryo-EM structure is almost identical to the SR  
144 and XFEL structures at the backbone level. In the cryo-EM density map, we assigned  
145 2432 water molecules at a contour level of 5 σ, which are slightly less than the number of  
146 waters assigned in the SR and XFEL structures<sup>6,10</sup>. The atomic displacement parameter  
147 (ADP) of the cryo-EM structure refined with Refmac5 in reciprocal space correlated well  
148 with that of the SR structure (Supplementary Fig. 5), although it may be somewhat

149 overestimated in the cryo-EM structure. Since the cryo-EM map was subjected to  
150 B-factor sharpening with Postprocessing, it is not suitable to compare ADP values  
151 directly between cryo-EM and X-ray structures. Nevertheless, the relative ADP of the  
152 atoms in the molecule appears to reflect the characteristics of the map. The average ADP  
153 for the OEC atoms ( $13.8 \text{ \AA}^2$ ) were found to be lower than that observed in the overall  
154 protein atoms of the cryo-EM structure ( $20.6 \text{ \AA}^2$ ), suggesting that the structure of OEC  
155 was determined more reliably than that of the overall structure. This may be due to the  
156 presence of metal ions in the  $\text{Mn}_4\text{CaO}_5$  cluster, which gives rise to higher cryo-EM  
157 density than that of lighter protein atoms.

158

### 159 **Electron beam damage to the PSII structure**

160 Several regions of PSII were found to have different structures between cryo-EM  
161 and XFEL, which are considered to arise from electron beam induced damage. In the  
162 PsbO subunit, a disulfide bond between Cys19 and Cys41 was observed in the XFEL  
163 structure<sup>10</sup>, but it was completely cleaved in the cryo-EM structure (Fig. 3a). In the C  
164 terminus of D1 subunit, a part of Ala344, the C-terminal residue that coordinated to the  
165  $\text{Mn}_4\text{CaO}_5$  cluster, flipped out from the OEC and adopted an alternative conformation in  
166 the cryo-EM structure (Fig. 3b). These are the typical sign of damage caused by the  
167 electron beam irradiation during the acquirement of cryo-EM images.

168 In the OEC, the positions of heavy metals were confirmed clearly and were assigned  
169 based on their highest peaks in the cryo-EM map achieved at the high-dose (Fig. 4a). In  
170 addition, five oxo-oxygen atoms and four water molecules ligated to the OEC were



171 assigned in the difference map, which were obtained by subtracting the metal densities in  
172 a diameter of 1.5 Å of that metal from the whole cryo-EM map. The overall architecture  
173 of the OEC in the cryo-EM structure is very similar to that of the SR and XFEL structures,  
174 however, distinct differences were observed in Mn–Mn and Mn–O distances (Table 3).  
175 The Mn–Mn distances calculated from the initially assigned positions based on the  
176 cryo-EM density were 2.8 Å for Mn1–Mn2, 3.5 Å for Mn1–Mn3, 5.0 Å for Mn1–Mn4,  
177 3.1 Å for Mn2–Mn3, 5.4 Å for Mn2–Mn4, and 2.7 Å for Mn3–Mn4 (Table 3). Except the  
178 Mn1–Mn4 and Mn3–Mn4 distances, all of the Mn–Mn distances are 0.1–0.2 Å and 0.1–0.4  
179 Å longer than those of the SR and XFEL structures, respectively<sup>6,10</sup>. Most of the Mn–O  
180 distances in the cryo-EM structure were also 0.1–0.5 Å and 0.1–0.7 Å longer than those in  
181 the SR and XFEL structures, respectively (Table 3)<sup>6,10</sup>. These differences may be caused  
182 by two factors. One is the electron beam damage, and the other one is the experimental  
183 errors in determining the positions of the individual atoms based on the cryo-EM map  
184 only. Especially, the position of oxygen atoms may not be determined precisely because  
185 the map of the oxygen atoms cannot be separated from the map of metal atoms. Thus, the  
186 OEC structure was refined with the restraints for bond distances (Mn–O and Ca–O) that  
187 were taken from the initial positions. The Mn–Mn distances refined with restraints were  
188 2.8 Å for Mn1–Mn2, 3.4 Å for Mn1–Mn3, 5.0 Å for Mn1–Mn4, 3.1 Å for Mn2–Mn3, 5.6  
189 Å for Mn2–Mn4, and 3.0 Å for Mn3–Mn4 (Fig. 4b and Table 3). Except the Mn1–Mn4  
190 distance, all of the Mn–Mn distances are still 0.1–0.2 Å and 0.1–0.4 Å longer than those of  
191 the SR and XFEL structures, respectively<sup>6,10</sup>. Most of the Mn–O distances in the cryo-EM  
192 structure refined with the restraints were also 0.1–0.4 Å longer than those in the SR and

193 XFEL structures (Table 3). In addition, the occupancy of the OEC atoms refined with  
194 Refmac5 were found to be lower than 1.0 (0.87). These results indicate that the OEC is  
195 reduced by electron dose exposed, leading to the elongation of the Mn-Mn and Mn-O  
196 distances and some disorder or displacement of the metal centers during the cryo-EM  
197 data acquisition. This reduced occupancy is in agreement with the previous theoretical  
198 calculation of the cryo-EM structure of higher plant PSII-LHCII supercomplex<sup>25</sup>, which  
199 may be the reason why a part of Ala344 flipped out and does not ligate to the OEC. The  
200 reduction of metal ions with electron doses was already observed in electron  
201 crystallography previously<sup>26</sup>.

202 Further structural changes in the redox-active sites, including reaction center  
203 chlorophylls, electron transfer chain, proton channels and water channels, were not found  
204 except the water molecule near D2-Tyr160 (Y<sub>D</sub>) (Supplementary Fig. 6c). This water  
205 molecule was disordered at two positions with one being able to hydrogen bond to Y<sub>D</sub> and  
206 the other one being able to hydrogen bond to D2-Arg180 in the SR structure and XFEL  
207 structures<sup>6,10</sup>. In the cryo-EM structure, this water molecule was ordered and connected to  
208 D2-Arg180. This may reflect the electron beam induced damage, which causes reduction  
209 of Y<sub>D</sub> and broken the hydrogen-bond to Y<sub>D</sub><sup>+</sup>.

210

## 211 **Reducing electron beam dosage in determining the PSII structure**

212 In order to reduce the electron beam damage, the final cryo-EM maps were  
213 calculated from only initial several frames of each movie stack. In Supplementary Fig. 7,  
214 the inverse resolutions of reconstructions achieved from decreased electron doses for the

ARM-60k data set, associated with the frame numbers, are plotted against the dose values on a logarithmic scale. Surprisingly, the electron doses from  $83 \text{ e}^- \text{ \AA}^{-2}$  down to  $10 \text{ e}^- \text{ \AA}^{-2}$  gave rise to almost the same resolution, indicating that increase in the electron beam dosage during this range does not contribute to increase in the resolution significantly. Near atomic resolution is retained at the total dose of  $3.3 \text{ e}^- \text{ \AA}^{-2}$  for the ARM-60k data set ( $2.08 \text{ \AA}$ ), which was achieved by using the initial 2 frames of each micrograph.

An overall atomic model of the low-dose PSII was built based on the highest  $2.08 \text{ \AA}$  resolution density reconstructed from the ARM-60k data set at the dose of  $3.3 \text{ e}^- \text{ \AA}^{-2}$  (Table 2). The overall architecture of the low-dose PSII is very similar to that of the high-dose PSII, with a RMSD of  $0.21 \text{ \AA}$  for 5310  $C_\alpha$  atoms between the structures of high-dose and low-dose. However, in the regions where structural changes were observed due to electron beam damage, the disulfide bond between Cys19 and Cys41 of the PsbO was restored at a dose of  $5 \text{ e}^- \text{ \AA}^{-2}$ , and Ala344 of the D1 subunit was returned to the single conformation to ligate to the OEC similar to those seen in the crystal structures (Fig. 3, 4 and 5, Supplementary Fig. 6 and 8). The ADP for the OEC atoms ( $12.8 \text{ \AA}^2$ ) were lower than that observed in the overall protein atoms of the cryo-EM structure ( $22.4 \text{ \AA}^2$ ), and the occupancy value of the OEC atoms refined with Refmac5 was returned to 1.0. These results indicate the reduction of the electron beam damage in the structure. However, similar to the high-dose structure, the water molecule near  $Y_D$  are connected to D2-Arg180 in an ordered manner and not hydrogen-bonded to  $Y_D$  (Supplementary Fig. 6), indicating that some electron beam damage remained.

The Mn–Mn distances calculated from the initially assigned positions based on the

237 cryo-EM density were 3.0 Å for Mn1–Mn2, 3.4 Å for Mn1–Mn3, 5.3 Å for Mn1–Mn4,  
 238 2.8 Å for Mn2–Mn3, 5.4 Å for Mn2–Mn4, and 3.1 Å for Mn3–Mn4 (Table 3). All of these  
 239 Mn–Mn distances are 0.1–0.3 Å longer than those of the SR and XFEL structures<sup>6,10</sup>.  
 240 Most of the Mn–O distances in the cryo-EM structure were also 0.1–0.6 Å and 0.1–0.8 Å  
 241 longer than those in the SR and XFEL structures, respectively (Table 3). As is done with  
 242 the high-dose structure, we refined the OEC structure with the restraints for bond  
 243 distances of Mn–O and Ca–O that were taken from the initial positions. The Mn–Mn  
 244 distances in the OEC refined with the restraints were 2.9 Å for Mn1–Mn2, 3.2 Å for  
 245 Mn1–Mn3, 5.1 Å for Mn1–Mn4, 2.9 Å for Mn2–Mn3, 5.4 Å for Mn2–Mn4, and 3.0 Å for  
 246 Mn3–Mn4 (Fig. 4f, Table 3). Most of these distances are shorter than those of the  
 247 high-dose structure and close to those of the XFEL structure, although most of them are  
 248 still longer than the SR and XFEL structures by 0.1 Å and 0.1–0.2 Å, respectively (Table  
 249 3). The Mn–O distances after refinement with the restraints also became close to the  
 250 XFEL structure, indicating the necessity of refinement with restraints. However, some of  
 251 the Mn–O distances were still longer or deviated from those found in the XFEL structure,  
 252 which may be caused by the electron beam damage remained and/or coordinate errors in  
 253 the cryo-EM analysis at the current resolution.

254

## 255 Discussion

256 In recent years, the resolution of single-particle cryo-EM has improved to atomic  
 257 resolutions without crystallization, and it has been reported that biological samples are  
 258 damaged by electron beams. In this study we elucidated the structure of the PSII at 1.95 Å

259 resolution in solution by cryo-EM, which is similar to the SR or XFEL structure in the  
260 crystalline state except the PsbY subunit, which was visible in the cryo-EM structure but  
261 absent or partially visible in the SR and XFEL structures<sup>6,10</sup>. This indicates that the  
262 structure solved by cryo-EM more closely represents the physiological state.

263 Despite the total electron dose of  $83 \text{ e}^- \text{ \AA}^{-2}$  which is commonly used in the acquisition  
264 of cryo-EM images, radiation damages are found in regions susceptible to redox changes,  
265 i.e. the disulfide bond and the redox-active metals, whereas the overall structure is very  
266 similar to those of the SR and XFEL structures<sup>6,10</sup>. The exposure of the sample to a flux of  
267 electrons is conveniently expressed in terms of electrons per  $\text{\AA}^2$  of specimen surface area  
268 ( $\text{e}^- \text{ \AA}^{-2}$ ), which is converted to the SI unit for the absorbed ionizing radiation, the Gray (Gy,  
269 with  $1 \text{ Gy} = 1 \text{ J kg}^{-1}$ ), by a factor of  $\square 3.7^{27}$ . Thus, the total electron dose of  $83 \text{ e}^- \text{ \AA}^{-2}$  is  
270 equal to the absorption of 307 MGy, which greatly exceeds the Henderson limit (20  
271 MGy) that is the X-ray dose that a cryo-cooled crystal can absorb before the diffraction  
272 pattern decays to half of its original intensity<sup>28</sup>. Nevertheless, our cryo-EM structure is  
273 almost the same to the SR and XFEL structures in the redox-active sites, including  
274 reaction center chlorophylls, electron transfer chain, proton channels and water channels,  
275 indicating that the radiation damage does not affect the structure significantly. This is  
276 considered to be the result of successful dose-weighted correction in the Bayesian  
277 polishing step. However, in the PsbO subunit, disulfide bond between Cys19 and Cys41  
278 were completely breaking (Fig. 3) in the cryo-EM structure. In the OEC structure, the  
279 Mn-Mn were 0.1–0.4  $\text{\AA}$  longer than those in the XFEL structure, and most of the Mn-O  
280 distances were also significantly longer. In addition, the occupancy of the OEC atoms

281 were lower than 1.0 (0.87), resulting in a multiple conformation of the C-terminal residue  
282 of D1, where a part of Ala344 flipped to a direction that does not ligate to the OEC.

283 We examined whether radiation damage could be reduced by reducing the total  
284 number of stacked movie frames used in the structural analysis. In the electron doses  
285 analyzed, the reconstructed map from summing the initial two frames of each micrograph  
286 ( $3 \text{ e}^- \text{ \AA}^{-2}$ , 11.1 MGy) gave rise to almost similar resolutions to that of high-dose data set  
287 ( $83 \text{ e}^- \text{ \AA}^{-2}$ , 307 MGy) (Supplementary Fig.7). The reconstructed map from the ARM-60k  
288 data set at the dose of  $3.3 \text{ e}^- \text{ \AA}^{-2}$  (11.1 MGy) gave a resolution of 2.08 Å. This structure  
289 was compared with that obtained with the high-dose, and it was found that the disulfide  
290 bond in the PsbO was recovered, and Ala344 of the D1 subunit was returned to the single  
291 conformation similar to the SR and XFEL structures (Fig. 3 and 5). This indicates a  
292 significant reduction of the electron beam damage to the structure. In the structure of  
293 OEC, most of the Mn-Mn and Mn-O distances became shorter than those observed in the  
294 high-dose structure before refinement. However, some of them are still significantly  
295 deviated from those of the XFEL structure (Table 3), which become closer after the  
296 refinement with restraints starting from the initial structure. Thus, it is advisable to refine  
297 the cryo-EM structure with restraints imposed for compounds such as the  $\text{Mn}_4\text{CaO}_5$   
298 cluster.

299 After refinement, most of the Mn-Mn and Mn-O distances of the low-dose structure  
300 are similar to those observed in the XFEL structure. However, some of the distances are  
301 still longer than or deviated from those found in the damage free XFEL structure<sup>10</sup>. This  
302 may be caused by two reasons; one is some electron beam damage remained, and the

other one is coordinate errors existed in the cryo-EM structure. It has been reported that about 80% of Mn of OEC in solution is reduced to divalent cations by an X-ray dose of 5 MGy<sup>7</sup>. Even though it is estimated that about 90% of Mn of OEC is Mn(II) at an electron beam dose of 11.1 MGy used for the low-dose structure, the structure of the OEC retained an occupancy of 1.0. This may be contributed by the stability of the structure of OEC, as the metal ions of OEC are liganded by seven amino acid residues (D1-D170, D1-E189, D1-H332, D1-E333, D1-D342, D1-A344, and CP43-E354). However, the longer distances observed in some of the metal-oxygen distances of OEC even in the low-dose structure indicated the existence of electron beam damage. Tanaka et al. has reported that, using SR, a dose of 0.1 MGy is necessary to achieve a structure similar to that of the XFEL structure<sup>29</sup>. Thus, in order to achieve a damage free structure, the electron beam dose needs to be further reduced. Fortunately, our data indicated that the resolution depends on the particles used, and by using more images and particles, it will be possible to lower the electron beam dose and achieve the structure at a higher resolution.

Coordinate errors in the cryo-EM structure may be caused by the ambiguities in the orientations of particles and their averaging, as well as the subsequent structural analysis procedures. Structural analysis by cryo-EM at a higher resolution should eliminate such errors, and gives rise to a more accurate structure. It is also expected that improvements in the averaging and structural analysis algorithms of the cryo-EM data may improve the accuracy of the structures at the same resolutions.

In summary, we show that the electron dose commonly used in cryo-EM is damaging to protein samples. However, the damaged area was limited to redox-sensitive part. Our

325 results suggest that it is possible to obtain a structure with less damage and high  
326 resolution by reducing the total dose and increasing the number of particles. This study  
327 will serve as a good indicator for determining damage-less cryo-EM structures of PSII  
328 and all biological samples, especially redox-active metalloproteins.

329

330

## 331 **Methods**

332 **Growth of cells and purification of PSII.** Cells of *Thermosynechococcus vulcanus* (*T.*  
333 *vulcanus*) were grown in four 10 L bottles at 50°C. PSII with a high oxygen evolving  
334 activity was purified from *T. vulcanus* as described previously<sup>30-32</sup> and suspended with a  
335 buffer containing 20 mM MES-NaOH (pH 6.0), 0.04%  $\beta$ -dodecyl-D-maltopyranoside  
336 and 5% glycerol. For the Titan-96k and ARM-60k data collection, glycerol in the buffer  
337 was removed by polyethylene glycol (PEG) precipitation and the resultant PSII was  
338 re-suspended in a buffer containing 20 mM MES-NaOH (pH 6.0), 20 mM NaCl, 3 mM  
339  $\text{CaCl}_2$ , 0.04%  $\beta$ -dodecyl-D-maltopyranoside.

340

341 **Cryo-EM data collection.** For cryo-EM experiments, 3- $\mu\text{L}$  aliquots of the PSII sample  
342 at each condition (shown in Table 1) were applied to Quantifoil R1.2/1.3, Mo 300 mesh  
343 or Cu 200 mesh grids. The grids were incubated for 10 s in an FEI Vitrobot Mark IV at  
344 4°C and 100% humidity. The grids were immediately plunged into liquid ethane cooled  
345 by liquid nitrogen and then transferred into the Titan Krios (Thermo Fischer Scientific)  
346 equipped with a field emission gun, a Cs corrector (CEOS GmbH), and a direct electron



347 detection camera (Falcon 3EC, Thermo Fischer Scientific), or CRYO ARM 300 (JEOL)  
 348 equipped with a cold-field emission gun and a direct electron detection camera (Gatan K2  
 349 summit, Gatan Inc). These microscopes were operated at 300 kV and a nominal  
 350 magnification of  $\times 75,000$  (Titan-75k),  $\times 96,000$  (Titan-96k) for Titan Krios and  $\times 60,000$   
 351 (ARM-60k) for CRYO ARM 300. Images were recorded using the Falcon 3EC in linear  
 352 mode or Gatan K2 summit in counting mode. Micrographs were recorded with a pixel  
 353 size of 0.870 Å, 0.678 Å and 0.822 Å at a dose rate of 40 electrons Å<sup>-2</sup> sec<sup>-1</sup>, 40 electrons  
 354 Å<sup>-2</sup> sec<sup>-1</sup> and 83 electrons Å<sup>-2</sup> sec<sup>-1</sup> for Titan-75k, Titan-96k and ARM-60k, respectively.  
 355 The nominal defocus range were  $-1.0$  to  $-2.0$  μm,  $-1.0$  to  $-2.5$  μm, and  $-0.8$  to  $-1.6$  μm  
 356 for Titan-75k, Titan-96k and ARM-60k, respectively. Each exposure was conducted for  
 357 45.11 s, 26.64 s and 10.00 s, and were dose-fractionated into 78, 39 and 50 movie frames  
 358 for Titan-75k, Titan-96k and ARM-60k, respectively. We acquired 2,084, 4,237 and  
 359 2,160 images for the data sets of Titan-75k, Titan-96k and ARM-60k, respectively.

360

361 **Cryo-EM image processing.** Movie frames were aligned and summed using the  
 362 MotionCor2 software<sup>33</sup> to obtain a final dose weighted image. Estimation of the contrast  
 363 transfer function (CTF) was performed using the CTFFIND4 program<sup>34</sup>. All of the  
 364 following processes were performed using RELION3.0<sup>35</sup>. For structural analyses of the  
 365 Titan-75k data set, 354,233 particles were automatically picked from 2,084 micrographs  
 366 and then were used for reference-free 2D classification. Then, 309,028 particles were  
 367 selected from the good 2D classes and subjected to 3D classification with a C2 symmetry.  
 368 The 1.9 Å PSII structure from *T. vulcanus* (PDB: 3WU2)<sup>6</sup> was employed for the initial

369 model for the first 3D classification with 60-Å low-pass filter. As shown in the  
370 Supplementary Fig. 1 and 2, the PSII structure was reconstructed from 90,897 particles at  
371 an overall resolution of 2.22 Å. For structural analyses of the Titan-96k data set, 612,287  
372 particles were automatically picked from 4,237 micrographs and then used for  
373 reference-free 2D classification. Then, 566,145 particles were selected from the good 2D  
374 classes and subjected to 3D classification with a C2 symmetry. The 2.22-Å map from  
375 Titan-75k data was employed for the initial model for the first 3D classification with a  
376 60-Å low-pass filter. As shown in the Supplementary Fig. 1 and 2, the PSII structure was  
377 reconstructed from 203,912 particles at an overall resolution of 2.20 Å. For structural  
378 analyses of the ARM-60k data set, 481,946 particles were automatically picked from  
379 2,160 micrographs and used for reference-free 2D classification. Then, 481,927 particles  
380 were selected from the good 2D classes and subjected to 3D classification with a C2  
381 symmetry. The 2.22-Å map from Titan-75k data was employed for the initial model for  
382 the first 3D classification with a 60-Å low-pass filter. The PSII structure was  
383 reconstructed from 174,099 particles at an overall resolution of 1.95 Å (Supplementary  
384 Fig. 3 and 4). For the low-dose maps, the summing number of movie frames were  
385 decreased in the final step of Bayesian polishing and used for reconstruction without  
386 refinement of particle positions and orientations, using RELION<sup>35</sup> with the command line  
387 option “relion\_reconstruct” and then post-processed in RELION<sup>35</sup>. All of the resolution  
388 was estimated by the gold-standard Fourier shell correlation (FSC) curve with a cut-off  
389 value of 0.143 (Supplementary Fig. 2 and 4)<sup>36</sup>. The local resolution was estimated using  
390 RELION<sup>35</sup>.

391

392 **B-factor estimation.** For the B-factor plot, the total set of all particles from the final  
393 refinement was randomly resampled into smaller subsets. These subsets were subjected  
394 to 3D auto-refinement and the resulting orientations were used to calculate  
395 reconstructions for each of the two random halves used in the auto-refinement. The  
396 squared values of the resulted, estimated resolutions were then plotted against the natural  
397 logarithm of the number of particles in the subset, and B-factors were calculated from the  
398 slope of the straight line best fitted with the points in the plot (Fig.1).

399

400 **Model building and refinement.** The 1.95-Å and 2.08-Å cryo-EM maps were used for  
401 model building of the high-dose and low-dose PSII structures, respectively. First, the  
402 crystal structure of *T. vulcanus* PSII (PDB: 3WU2) was manually fitted into each  
403 cryo-EM map using UCSF Chimera<sup>37</sup>, and then the structures were inspected and  
404 adjusted individually with COOT<sup>38</sup>. The structures of high-dose PSII and low-dose PSII  
405 were then refined with phenix.real\_space\_refine<sup>39</sup> and Refmac5<sup>40</sup> with geometric  
406 restraints for the protein-cofactor coordination. The positions of four manganese atoms  
407 and one calcium atom were clearly visible in the cryo-EM map (Fig. 2 and 4). The  
408 positions of the five oxo-oxygen atoms and four water molecules ligated to the OEC were  
409 less clear, and they were identified by the difference map in which, the maps of metal ions  
410 with a diameter of 1.5 Å from that metal ion were subtracted from the whole cryo-EM  
411 map, after placement of the manganese and calcium atoms (Fig. 2 and 4). The initial  
412 positions of metal and oxygen atoms were assigned based on the highest peaks in the

413 cryo-EM maps. This was taken as the initial structure. Subsequently, we performed the  
414 structural refinement with loose restraints ( $0.1 \sigma$ ) for bond distances (Mn–O and Ca–O)  
415 that were taken from the initial position. Then the refinement was performed with tighter  
416 restraints ( $0.05 \sigma$ ) for bond distances successively using the modified ‘new’ library for the  
417 bond distances. This geometry optimization procedure was repeated several times until  
418 the bond distances converged. However, the distance of Mn4-O4 in the high-dose  
419 structure, and the distances of Mn1-O1 and Mn3-O2 in the low-dose structure, were fixed  
420 to  $1.8 \text{ \AA}$ , because these distances were too close and could not be refined. The averages of  
421 the distances of Mn–Mn, Mn–Ca, Mn–O and Mn–ligand were calculated from each PSII  
422 in the final four refinement steps and are listed in Table 3. The final models were further  
423 validated with Q-score<sup>41</sup>, MolProbity<sup>42</sup> and EMringer<sup>43</sup>. The statistics for all data  
424 collection and structure refinement are summarized in Table 1 and 2. All structural  
425 figures are made by Pymol<sup>44</sup> or UCSF ChimeraX<sup>45</sup>.

426

427 **Difference map analysis between low-dose PSII and high-dose PSII.** A difference  
428 map was calculated by subtracting high-dose map from the low-dose map, i.e. (low-dose  
429 PSII) minus (high-dose PSII). The rotational and translational matrix was calculated  
430 based on the refined atomic coordinates using lsqkab in CCP4<sup>46</sup>. A map of low-dose PSII  
431 was superposed with a map of high-dose PSII which were applied by a low-pass filter and  
432 adjusted to  $2.08 \text{ \AA}$  resolution, with calculated rotational and translational matrix using  
433 maprot in CCP4<sup>47</sup>. The high-dose PSII map and the low-dose PSII map was normalized  
434 based on the ratio of the root mean square map density value and then the difference maps

were calculated using UCSF Chimera<sup>37</sup> with the command line option “vop subtract”  
(Supplementary Fig. 8).

**Data availability.** Atomic coordinates and cyro-EM maps for the reported structure of  
PSII determined from the high-dose data set of ARM-60K and low-dose data set of  
ARM-60k were deposited in the Protein Data Bank under an accession codes 7D1T and  
7D1U, respectively, and in the Electron Microscopy Data Bank under the accession codes  
EMD-30547, EMD-30548, respectively. The cryo-EM maps of the Titan-75k data set and  
Titan-96k data set were deposited in the Electron Microscopy Data Bank under the  
accession codes EMD-30549 and EMD-30550, respectively.

## Acknowledgements

This work was supported by JSPS KAKENHI No. JP20H02914 (K.K.), JP19K22396,  
JP20H03194 (F.A.), JP20H05087 (N.M.), JP17H06434 (J.-R.S.), JST PRESTO No.  
JPMJPR16P1 (F.A.), the Platform Project for Supporting Drug Discovery and Life  
Science Research (Basis for Supporting Innovative Drug Discovery, Life Science  
Research (BINDS)) of AMED No. JP18am0101072j002 (N.M.), and the Cyclic  
Innovation for Clinical Empowerment (CiCLE) from AMED (K.Y.).

## Author Contributions

J.-R.S. and K. Y. conceived the project; Y.N. and F.A. purified the PSII; N.M. and T.H.

457 collected cryo-EM images; N. M., K.K. and T.H. processed the EM data. K.K. built the  
458 structure model and refined the final models; K.K. analyzed the structure; and K.K., T.H.,  
459 N.M. and J.-R.S. wrote the paper, and all of the authors joined the discussion of the  
460 results.

461

462

## 463     **References**

- 464     1     Kok, B., Forbush, B., & McGloin, M. Cooperation of charges in photosynthetic  
465           oxygen evolution. I. A linear four step mechanism. *Photochem. Photobiol.* **11**,  
466           457-475 (1970).
- 467     2     Zouni, A. et al. Crystal structure of photosystem II from *Synechococcus elongatus*  
468           3.8 Å resolution. *Nature* **409**, 739-743 (2001).
- 469     3     Kamiya, N. & Shen, J.-R. Crystal structure of oxygen-evolving photosystem II from  
470           *Thermosynechococcus vulcanus* at 3.7-Å resolution. *Proc. Natl Acad. Sci. USA* **100**,  
471           98–103 (2003).
- 472     4     Ferreira, K. N. et al. Architecture of the photosynthetic oxygen-evolving center.  
473           *Science* **303**, 1831–1838 (2004).
- 474     5     Guskov, A. et al. Cyanobacterial photosystem II at 2.9-Å resolution and the role of  
475           quinones, lipids, channels and chloride. *Nat. Struct. Mol. Biol.* **16**, 334–342 (2009).
- 476     6     Umena, Y. et al. Crystal structure of oxygen-evolving photosystem II at a resolution  
477           of 1.9 Å. *Nature* **473**, 55–60 (2011).
- 478     7     Yano, J. et al. X-ray damage to the Mn<sub>4</sub>Ca complex in single crystals of  
479           photosystem II: a case study for metalloprotein crystallography. *Proc. Natl Acad.*  
480           *Sci. USA* **102**, 12047–12052 (2005).
- 481     8     Neutze, R. et al. Potential for biomolecular imaging with femtosecond X-ray pulses,  
482           *Nature*, **406**, 752-757 (2000).
- 483     9     Hirata, K. et al. A 1.9 Å resolution structure of 420 kDa cytochrome oxidase by  
484           femtosecond crystallography. *Nat. Methods* **11**, 734-736 (2014).

- 485 10 Suga, M. et al. Native structure of photosystem II at 1.95 Å resolution viewed by  
486 femtosecond X-ray pulses. *Nature* **517**, 99–103 (2015).
- 487 11 Suga, M. et al. Light-induced structural changes and the site of O=O bond  
488 formation in PSII caught by XFEL. *Nature* **543**, 131–135 (2017).
- 489 12 Kern, J. et al. Structures of the intermediates of Kok’s photosynthetic water  
490 oxidation clock. *Nature* **563**, 421–425. (2018).
- 491 13 Suga, M. et al. An oxyl/oxo mechanism for oxygen-oxygen coupling in PSII  
492 revealed by an X-ray free-electron laser. *Science* **366**, 334–338 (2019).
- 493 14 Ibrahim, M. et al. Untangling the sequence of events during the S2 → S3 transition  
494 in photosystem II and implications for the water oxidation mechanism. *Proc. Natl*  
495 *Acad. Sci. USA* **117**, 12624–12635 (2020).
- 496 15 Kato, Y. et al. Fourier transform infrared analysis of the S-state cycle of water  
497 oxidation in the microcrystals of photosystem II. *J. Phys. Chem. Lett.* **9**, 2121–2126  
498 (2018).
- 499 16 Flores, J.A. et al. Connexin-46/50 in a dynamic lipid environment resolved by  
500 Cryo-EM at 1.9 Å. *Nature communications* **11**, 4331 (2020).
- 501 17 Nakane, T. et al. Single-particle cryo-EM at atomic resolution. Preprint at  
502 <https://doi.org/10.1101/2020.05.22.110189> (2020).
- 503 18 Yip, K.M. et al. Breaking the next Cryo-EM resolution barrier – Atomic resolution  
504 determination of protein! Preprint at <https://doi.org/10.1101/2020.05.21.106740>  
505 (2020).



- 506 19 Burmeister, W.P. Structural changes in a cryo-cooled protein crystal owing to radi-  
507 ation damage. *Acta Crystal. D* **56**, 328–341 (2000).
- 508 20 Ravelli, R.B. et al. The “fingerprint” that X-rays can leave on structures. *Structure*  
509 **8**, 315–328 (2000).
- 510 21 Weik, M. et al. Specific chemical and structural damage to proteins produced by  
511 synchrotron radiation. *Proc. Natl. Acad. Sci. U.S.A.* **97**, 623–628 (2000).
- 512 22 Hamaguchi, T., Maki-Yonekura, S., Naitow, H., Matsuura, Y., Ishikawa, T. and  
513 Yonekura, K. A new cryo-EM system for single particle analysis. *J. Struct. Biol.*  
514 **207**, 40–48 (2019).
- 515 23 Rosenthal, P. B. and Henderson, R., Optimal determination of particle orientation,  
516 absolute hand, and contrast loss in single-particle electron cryomicroscopy. *J. Mol.*  
517 *Biol.* **333**, 721-45 (2003).
- 518 24 Koua, F.H.M., Umena, Y., Kawakami K. & Shen J.-R. Structure of Sr-substituted  
519 photosystem II at 2.1 Å resolution and its implications in the mechanism of water  
520 oxidation. *Proc. Natl. Acad. Sci. USA* **110**, 3889-3894 (2013).
- 521 25 Wang, J. Et al. Reduced occupancy of the oxygen-evolving complex of  
522 photosystem II detected in cryo-electron microscopy maps. *Biochemistry* **57**,  
523 5925-5929 (2018).
- 524 26 Yonekura, K. Electron crystallography of ultrathin 3D protein crystals: Atomic  
525 model with charges. *Proc. Natl Acad. Sci. USA* **112**, 3368–3373 (2015).
- 526 27 Baker, L. A. Et al. Radiation damage in electron cryomicroscopy. *Methods in*  
527 *Enzym.* **481**, 371-388 (2010).

- 528 28 Henderson, R. Cryo-protection of protein crystals against radiation damage in  
529 electron and X-Ray diffraction. *Proc. R. Soc. Lond. B* **241**, 6-8 (1990).
- 530 29 Tanaka, A. et al. Two different structures of the oxygen-evolving complex in the  
531 same polypeptide frameworks of photosystem II *J. Am. Chem. Soc.* **139**, 1728-1721  
532 (2017).
- 533 30 Shen, J.-R., and Inoue, Y. Binding and functional properties of two new extrinsic  
534 components, cytochrome *c*-550 and a 12 kDa protein, in cyanobacterial  
535 photosystem II. *Biochemistry* **32**, 1825-1832 (1993).
- 536 31 Shen, J.-R., and Kamiya, N. Crystallization and the crystal properties of the  
537 oxygen-evolving photosystem II from *Synechococcus vulcanus*. *Biochemistry* **39**,  
538 14739-14744 (2000).
- 539 32 Shen, J.-R. et al. Purification and crystallization of oxygen-evolving photosystem II  
540 core complex from thermophilic cyanobacteria. *Methods in Mol. Biol.* **684**, 41-51  
541 (2011).
- 542 33 Zheng, S.Q. et al. MotionCor2: anisotropic correction of beam-induced motion for  
543 improved cryo-electron microscopy. *Nat. Methods* **14**, 331-332 (2017).
- 544 34 Mindell, J.A., and Grigorieff, N. Accurate determination of local defocus and  
545 specimen tilt in electron microscopy. *J Struct. Biol.* **142**, 334-347 (2003).
- 546 35 Scheres, S.H. RELION: implementation of a Bayesian approach to cryo-EM  
547 structure determination. *J. Struct. Biol.* **180**, 519-530 (2012).
- 548 36 Grigorieff, N., and Harrison, S.C. Near-atomic resolution reconstructions of  
549 icosahedral viruses from electron cryo-microscopy. *Curr. Opin. Struct. Biol.* **21**,

550 265-273 (2011).

551 37 Pettersen, E. F. et al. UCSF Chimera—a visualization system for exploratory  
552 research and analysis. *J. Comp. Chem.* **25**, 1605-1612 (2004).

553 38 Emsley, P. et al. Features and development of Coot. *Acta Crystal. D* **66**, 486-501  
554 (2010).

555 39 Adams, P. D. et al. PHENIX: a comprehensive Python-based system for  
556 macromolecular structure solution. *Acta Crystal. D* **66**, 213-221 (2010).

557 40 Murshudov, G. N. et al. REFMAC5 for the refinement of macromolecular crystal  
558 structures. *Acta Crystal. D* **67**, 355-367 (2011).

559 41 Pintilie, G. et al. Measurement of atom resolvability in cryo-EM maps with  
560 Q-scores. *Nat. Methods* **17**, 328-334 (2020).

561 42 Chen, V. B. et al. MolProbity: all-atom structure validation for macromolecular  
562 crystallography. *Acta Crystal. D* **66**, 12-21 (2010).

563 43 Barad, B. A. et al. EMRinger: side chain-directed model and map validation for 3D  
564 cryo-electron microscopy. *Nat. Methods* **12**, 943 (2015).

565 44 The PyMOL Molecular Graphics System, Version 2.1, Schrödinger, LLC.

566 45 Goddard, T.D. et al. UCSF ChimeraX: Meeting modern challenges in visualization  
567 and analysis. *Protein Sci.* **27**, 14-25 (2018).

568 46 Winn, M. D. et al. Overview of the CCP4 suite and current developments. *Acta*  
569 *Crystal. D* **67**, 235-242 (2011).

570 47 Kato K. et al. Structural basis for the adaptation and function of chlorophyll *f* in  
571 photosystem I. *Nat. Commun.* **11**, 1-10 (2020).

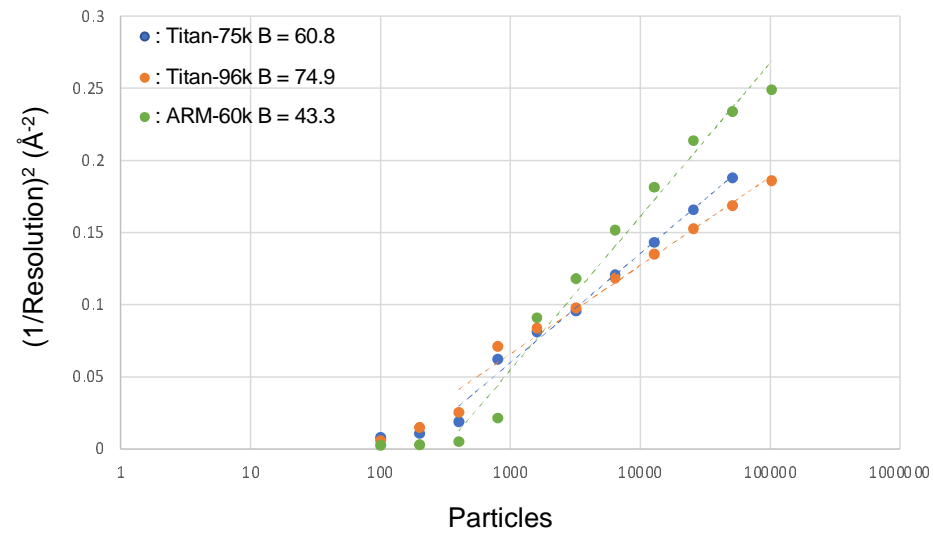

572 48  
573 49 **Fig. 1 B-factor plot for the data sets of Titan-75k, Titan-96k and ARM-60k.** B  
574 factor plot for the Titan-75k data set at a dose of 40 e<sup>-</sup> Å<sup>-2</sup> (blue), the Titan-96k data  
575 set at a dose of 40 e<sup>-</sup> Å<sup>-2</sup> (orange), and the ARM-60k data set at a dose of 83 e<sup>-</sup> Å<sup>-2</sup>  
576 (green).  
577 50

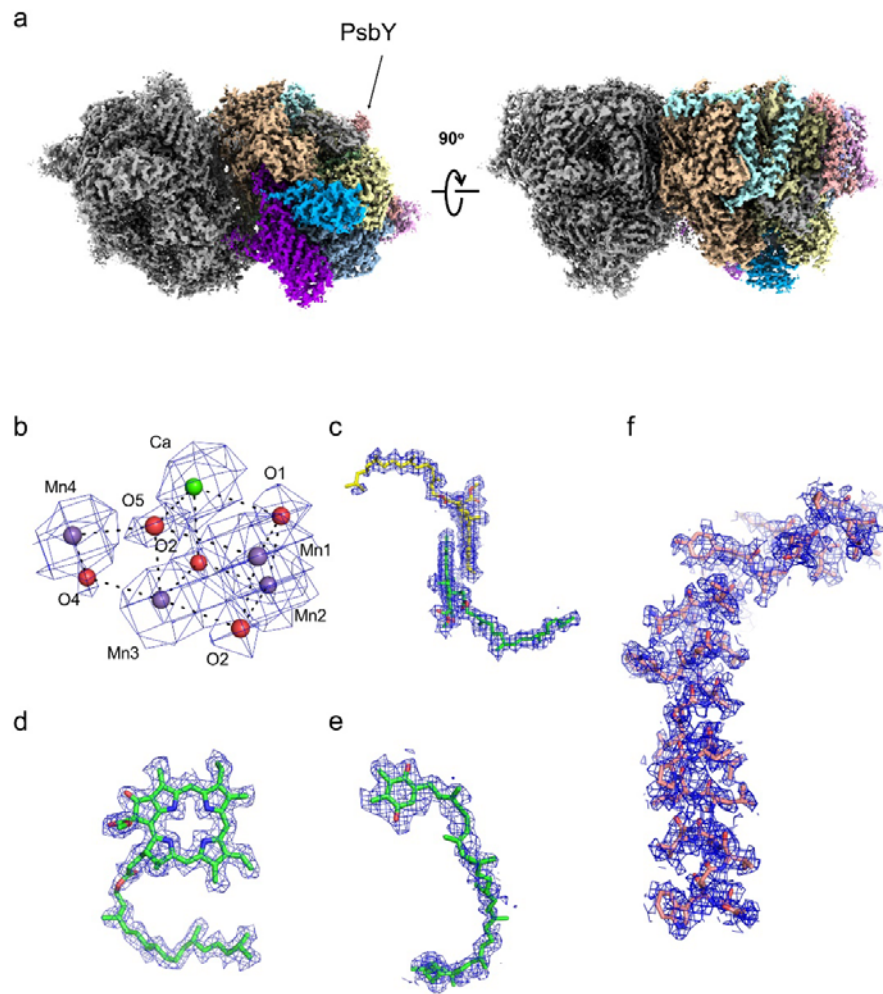

**Fig. 2 Overall structure of PSII at a high-dose.** **a** The cryo-EM density of the PSII at 1.95 Å resolution from the ARM-60k data set. **b-e** The cryo-EM density of cofactors, OEC (**b**), P680 (**c**), pheophytin (**d**) and plastoquinone ( $Q_B$ ) (**e**), superposed with the refined model. **f** The density of PsbY superposed with the refined model. The densities were depicted at 5  $\sigma$ .

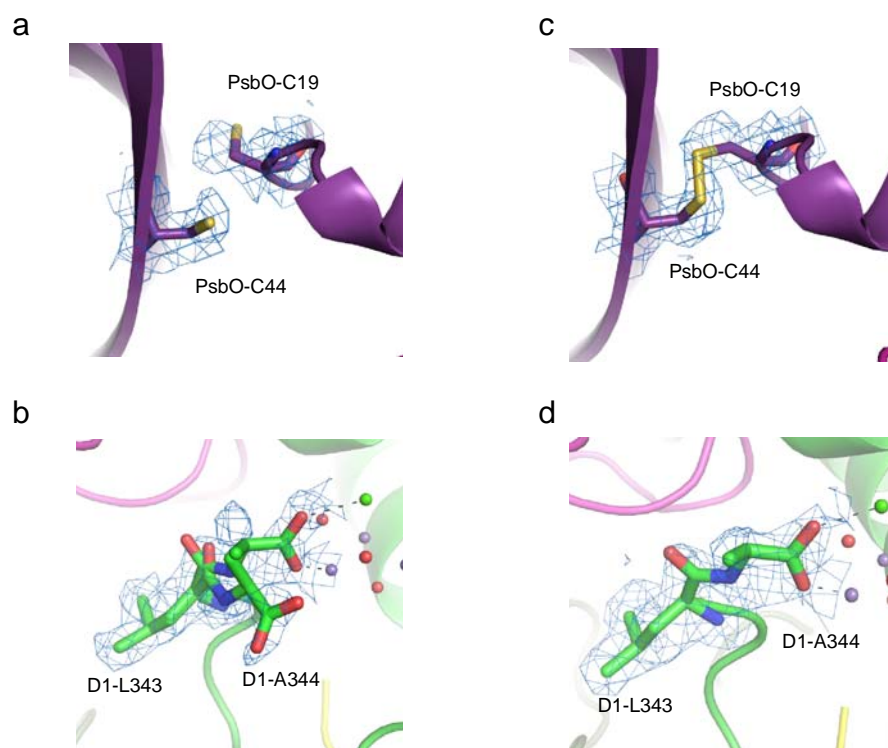

586  
587 **Fig. 3 Electron beam damages in the PSII structure of the ARM-60k data set at the**  
588 **high-dose ( $83 \text{ e}^- \text{ \AA}^{-2}$ ) and low-dose ( $3.3 \text{ e}^- \text{ \AA}^{-2}$ ).** **a** The broken disulfide bond in PsbO at  
589 the high-dose. **b** The alternative conformation at D1-A344 at the high dose. **c** The  
590 disulfide bond recovered in PsbO at the low-dose. **d** The single conformation of  
591 D1-A344 at the low dose. The densities were depicted at  $5 \sigma$ .

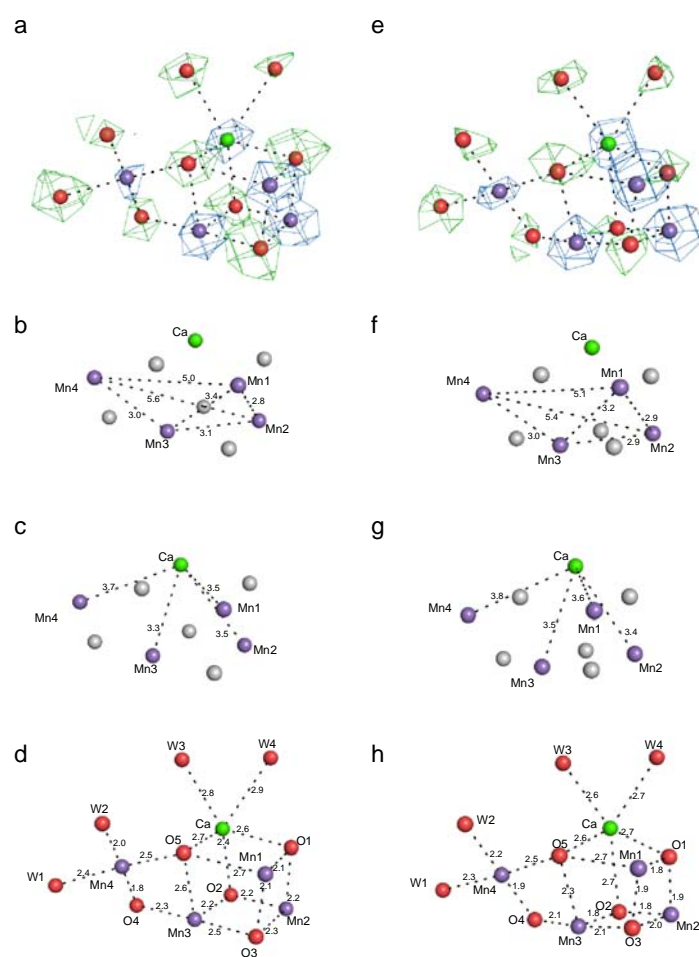

594  
595 **Fig. 4 Electron beam damages in the OEC structure solved at the high-dose (83 e<sup>-</sup>**  
596 **Å<sup>-2</sup>) and low-dose (3.3 e<sup>-</sup> Å<sup>-2</sup>).** **a-d:** High dose structure. **a** The cryo-EM density (blue)  
597 **for manganese and calcium atoms at 17 σ and the subtracted map (green) for oxygen**  
598 **atoms and water molecules at 7 σ. **b** Mn-Mn distances in the OEC (in Å). **c** Mn-Ca**  
599 **distances in the OEC (in Å) **d** Mn-O, Ca-O, Mn-water and Ca-water distances in the**  
600 **OEC (in Å). **e-h:** Low dose structure. **e** The cryo-EM density (blue) for manganese and**  
601 **calcium atoms at 17 σ and the subtracted map (green) for oxygen atoms and water**

602 molecules at 7  $\sigma$ . **f** Mn–Mn distances in the OEC (in Å). **g** Mn–Ca distances in the OEC  
603 (in Å). **h** Mn–O, Ca–O, Mn–water and Ca–water distances in the OEC (in Å).

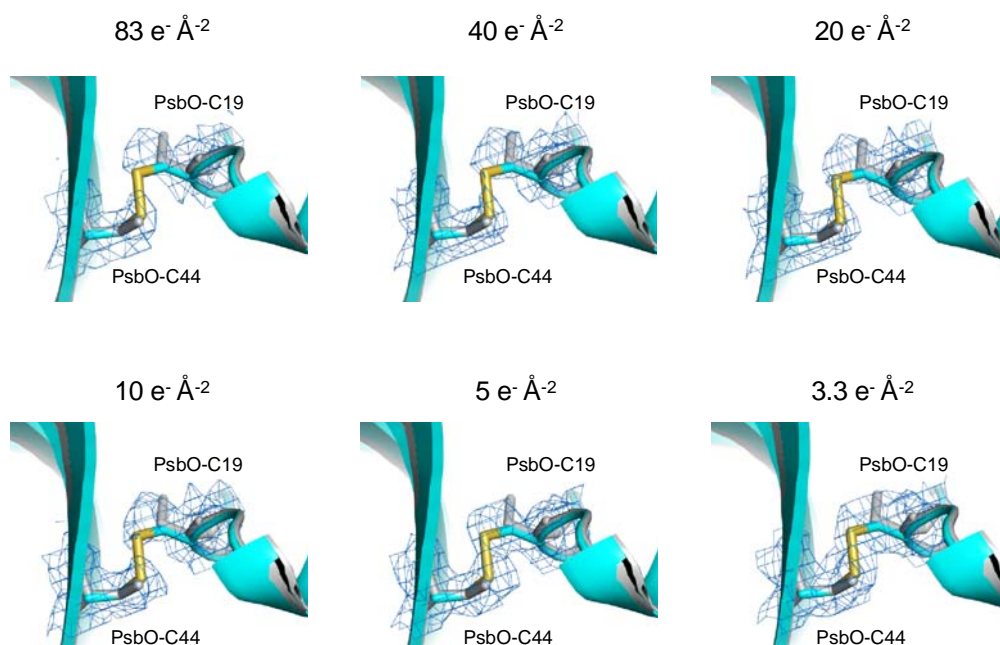

604  
605 **Fig. 5 Changes of the cryo-EM map in the region of the disulfide bond in PsaO**  
606 **with changes of the electron beam dose.** The cryo-EM maps for each electron dose are  
607 displayed as a blue mesh at 4  $\sigma$  and the corresponding models for low-dose (colored)  
608 and high-dose (gray) are shown as sticks.  
609



610 **Table 1 Sample preparation and Cryo-EM data collection parameters.**

| Data set                                         | Titan-75K                                          | Titan-96K            | ARM-60K                          |
|--------------------------------------------------|----------------------------------------------------|----------------------|----------------------------------|
| Original sample conc.                            | 3.8 Chl mg/ml                                      | 9.7 Chl mg/ml        | 9.7 Chl mg/ml                    |
| Original sample buffer                           | 20 mM MES (pH6.0), 5% glycerol, 0.04% $\beta$ -DDM | 20 mM MES (pH6.0)    | 20 mM MES (pH6.0)                |
| Dilution buffer                                  | 20 mM MES (pH6.0), 0.04% $\beta$ -DDM              | 20 mM MES (pH6.0)    | 20 mM MES (pH6.0)                |
| Dilution                                         | 10-fold                                            | 5-fold               | 5-fold                           |
| Final sample conc.                               | 0.38 Chl mg/ml                                     | 1.94 Chl mg/ml       | 1.94 Chl mg/ml                   |
| Data collection and processing                   |                                                    |                      |                                  |
| Microscope                                       | Titan Krios                                        | Titan Krios          | CRYO ARM 300                     |
| Detector                                         | Falcon3EC in EC mode                               | Falcon3EC in EC mode | Gatan K2 summit in Counting mode |
| Magnification                                    | 75K                                                | 96K                  | 60K                              |
| Voltage (kV)                                     | 300                                                | 300                  | 300                              |
| Defocus range ( $\mu$ m)                         | -1.00 to -2.00                                     | -1.00 to -2.50       | -0.8 to -1.6                     |
| Pixel size ( $\text{\AA}$ )                      | 0.870                                              | 0.678                | 0.822                            |
| Total electron dose ( $\text{\AA}^2$ )           | 40                                                 | 40                   | 83                               |
| Exposure time (s)                                | 45.11                                              | 24.64                | 10                               |
| Number of frames per image                       | 78                                                 | 39                   | 50                               |
| Number of micrographs                            | 2,084                                              | 4,237                | 2,160                            |
| Initial particle images                          | 354,233                                            | 612,287              | 444,729                          |
| Final particle images                            | 90,897                                             | 203,912              | 174,099                          |
| Map resolution ( $\text{\AA}$ )                  | 2.23 (2.22)*                                       | 2.26 (2.20)*         | 1.98 (1.95)*                     |
| Map sharpening B-factor ( $\text{\AA}^2$ )       | -54 (-53)*                                         | -60 (-56)*           | -34 (-32)*                       |
| Rosenthal-Henders on B factor ( $\text{\AA}^2$ ) | 60.8                                               | 74.9                 | 43.3                             |
| Applied symmetry                                 | C2                                                 | C2                   | C2                               |

611 \* After micelle-density subtraction

612

613 **Table 2 Statistics of data collection, processing and refinement.**

614

| <b>Refinement</b>             | <b>High-dose</b> | <b>Low-dose</b> |
|-------------------------------|------------------|-----------------|
| PDB ID                        | 7D1T             | 7D1U            |
| EMDB ID                       | EMD-30547        | EMD-30548       |
| Initial Model used (PDB code) | 3WU2             | 3WU2            |
| Model resolution (Å)          | 1.94             | 2.03            |
| FSC threshold                 | 0.5              | 0.5             |
| No. of atoms                  |                  |                 |
| Protein                       | 41708            | 41680           |
| Ligand                        | 8854             | 8854            |
| Water                         | 2432             | 2121            |
| B factors (Å <sup>2</sup> )   |                  |                 |
| Protein                       | 20.6             | 21.2            |
| Ligand                        | 23.5             | 24.1            |
| Water                         | 26.4             | 23.7            |
| R.m.s deviations              |                  |                 |
| Bond lengths (Å)              | 0.012            | 0.010           |
| Bond angles (°)               | 1.46             | 1.31            |
| Validation                    |                  |                 |
| MolProbity score              | 1.3              | 1.5             |
| Clashscore                    | 1.8              | 2.2             |
| Poor rotamers (%)             | 2.4              | 3.1             |
| EMRinger score                | 7.0              | 6.8             |
| Q-Score                       | 0.87             | 0.86            |
| Ramachandran plot             |                  |                 |
| Favored (%)                   | 97.93            | 97.55           |
| Allowd (%)                    | 1.88             | 2.26            |
| Disallowed (%)                | 0.19             | 0.19            |

615

616

617

618

619

620 **Table 3 Summarization of the distances of atoms of the Mn<sub>4</sub>CaO<sub>5</sub> cluster.**

|                | High-dose | Low-dose  | SR (3WU2) | XFEL (4UB6) | High-dose |      |      |      |         | Low-dose |      |      |      |         |
|----------------|-----------|-----------|-----------|-------------|-----------|------|------|------|---------|----------|------|------|------|---------|
|                | (Average) | (Average) | (Average) | (Average)   | 4th       | 3rd  | 2nd  | 1st  | Initial | 4th      | 3rd  | 2nd  | 1st  | Initial |
| <b>Mn1-Mn2</b> | 2.8       | 2.9       | 2.8       | 2.7         | 2.81      | 2.83 | 2.82 | 2.82 | 2.81    | 2.88     | 2.87 | 2.89 | 2.8  | 2.95    |
| <b>Mn1-Mn3</b> | 3.4       | 3.2       | 3.3       | 3.2         | 3.35      | 3.36 | 3.35 | 3.36 | 3.46    | 3.20     | 3.20 | 3.24 | 3.18 | 3.37    |
| <b>Mn1-Mn4</b> | 5.0       | 5.1       | 5         | 5           | 5.04      | 5.02 | 5.03 | 5.03 | 4.99    | 5.10     | 5.09 | 5.08 | 5.04 | 5.32    |
| <b>Mn2-Mn3</b> | 3.1       | 2.9       | 2.9       | 2.7         | 3.08      | 3.10 | 3.09 | 3.09 | 3.06    | 2.88     | 2.88 | 2.88 | 2.85 | 2.75    |
| <b>Mn2-Mn4</b> | 5.6       | 5.4       | 5.4       | 5.2         | 5.65      | 5.65 | 5.65 | 5.63 | 5.42    | 5.47     | 5.46 | 5.42 | 5.43 | 5.40    |
| <b>Mn3-Mn4</b> | 3.0       | 3.0       | 3.0       | 2.9         | 2.97      | 2.97 | 2.98 | 2.94 | 2.67    | 3.04     | 3.03 | 3.01 | 3.00 | 3.05    |
| <b>Mn1-Ca</b>  | 3.5       | 3.6       | 3.5       | 3.5         | 3.55      | 3.52 | 3.52 | 3.52 | 3.51    | 3.59     | 3.57 | 3.55 | 3.56 | 3.83    |
| <b>Mn2-Ca</b>  | 3.5       | 3.4       | 3.4       | 3.3         | 3.49      | 3.45 | 3.46 | 3.46 | 3.29    | 3.44     | 3.43 | 3.41 | 3.44 | 3.35    |
| <b>Mn3-Ca</b>  | 3.3       | 3.5       | 3.4       | 3.4         | 3.32      | 3.29 | 3.28 | 3.27 | 3.04    | 3.45     | 3.45 | 3.44 | 3.46 | 3.43    |
| <b>Mn4-Ca</b>  | 3.7       | 3.8       | 3.8       | 3.8         | 3.73      | 3.69 | 3.70 | 3.68 | 3.57    | 3.76     | 3.76 | 3.70 | 3.80 | 3.86    |
| <b>Mn1-O1</b>  | 2.1       | 1.8       | 1.9       | 1.8         | 2.11      | 2.10 | 2.08 | 2.06 | 2.34    | 1.80     | 1.76 | 1.77 | 1.78 | 2.09    |
| <b>Mn1-O3</b>  | 2.1       | 1.9       | 1.8       | 1.9         | 2.09      | 2.10 | 2.10 | 2.09 | 2.29    | 1.89     | 1.90 | 1.91 | 1.92 | 1.90    |
| <b>Mn1-O5</b>  | 2.7       | 2.7       | 2.6       | 2.7         | 2.72      | 2.73 | 2.74 | 2.75 | 2.64    | 2.71     | 2.72 | 2.72 | 2.72 | 2.89    |
| <b>Mn2-O1</b>  | 2.2       | 1.9       | 2.1       | 1.8         | 2.18      | 2.17 | 2.17 | 2.16 | 2.19    | 1.98     | 1.95 | 1.92 | 1.86 | 2.12    |
| <b>Mn2-O2</b>  | 2.2       | 1.8       | 2.1       | 1.8         | 2.24      | 2.23 | 2.2  | 2.17 | 2.45    | 1.84     | 1.83 | 1.82 | 1.80 | 2.45    |
| <b>Mn2-O3</b>  | 2.3       | 2.0       | 2.1       | 2.0         | 2.28      | 2.28 | 2.27 | 2.26 | 2.36    | 2.01     | 2.01 | 2.01 | 2.00 | 1.95    |
| <b>Mn3-O2</b>  | 2.2       | 1.8       | 1.9       | 1.9         | 2.18      | 2.18 | 2.16 | 2.14 | 2.04    | 1.80     | 1.78 | 1.81 | 1.86 | 2.08    |
| <b>Mn3-O3</b>  | 2.5       | 2.1       | 2.1       | 2.1         | 2.48      | 2.47 | 2.44 | 2.42 | 2.48    | 2.05     | 2.06 | 2.06 | 2.07 | 2.02    |
| <b>Mn3-O4</b>  | 2.3       | 2.1       | 2.1       | 1.9         | 2.30      | 2.30 | 2.28 | 2.26 | 2.38    | 2.17     | 2.11 | 2.05 | 1.96 | 2.71    |
| <b>Mn3-O5</b>  | 2.6       | 2.3       | 2.4       | 2.2         | 2.58      | 2.58 | 2.56 | 2.54 | 2.58    | 2.35     | 2.32 | 2.29 | 2.23 | 2.57    |
| <b>Mn4-O4</b>  | 1.8       | 1.9       | 2.1       | 2.0         | 1.80      | 1.80 | 1.79 | 1.82 | 1.96    | 1.86     | 1.89 | 1.92 | 1.97 | 2.05    |
| <b>Mn4-O5</b>  | 2.5       | 2.5       | 2.5       | 2.3         | 2.49      | 2.46 | 2.45 | 2.44 | 2.59    | 2.5      | 2.48 | 2.45 | 2.40 | 2.67    |
| <b>Mn4-W1</b>  | 2.4       | 2.3       | 2.2       | 2.3         | 2.38      | 2.40 | 2.39 | 2.40 | 2.54    | 2.31     | 2.32 | 2.36 | 2.32 | 2.33    |
| <b>Mn4-W2</b>  | 2.0       | 2.2       | 2.2       | 2.1         | 2.05      | 2.03 | 2.03 | 2.07 | 2.11    | 2.18     | 2.18 | 2.18 | 2.15 | 1.84    |
| <b>Ca-O1</b>   | 2.6       | 2.7       | 2.4       | 2.6         | 2.63      | 2.63 | 2.62 | 2.62 | 2.60    | 2.72     | 2.70 | 2.67 | 2.63 | 2.47    |
| <b>Ca-O2</b>   | 2.4       | 2.7       | 2.5       | 2.7         | 2.39      | 2.39 | 2.41 | 2.43 | 2.41    | 2.67     | 2.68 | 2.69 | 2.71 | 2.73    |
| <b>Ca-O5</b>   | 2.7       | 2.6       | 2.7       | 2.5         | 2.71      | 2.70 | 2.68 | 2.66 | 2.70    | 2.62     | 2.60 | 2.58 | 2.55 | 2.60    |
| <b>Ca-W3</b>   | 2.8       | 2.6       | 2.4       | 2.6         | 2.76      | 2.79 | 2.78 | 2.78 | 2.80    | 2.56     | 2.56 | 2.57 | 2.53 | 2.64    |
| <b>Ca-W4</b>   | 2.9       | 2.7       | 2.5       | 2.5         | 2.89      | 2.93 | 2.92 | 2.94 | 2.92    | 2.71     | 2.71 | 2.73 | 2.65 | 2.71    |

621  
622  
623
